# Supplementary material
Source: HighWire-hosted journal article supplement (https://bmjopen.bmj.com/content/12/7/e059925)
Supplement: inline-supplementary-material-2 [file inline-supplementary-material-2.pdf]

## APPENDIX 2

## Consolidated criteria for reporting qualitative studies (COREQ): 32-item checklist

| No                                   | Item                    | Guide questions/description                                                                                                                                       |
|--------------------------------------|-------------------------|-------------------------------------------------------------------------------------------------------------------------------------------------------------------|
| <b>Domain 1:</b>                     |                         |                                                                                                                                                                   |
| <b>Research team and reflexivity</b> |                         |                                                                                                                                                                   |
| Personal Characteristics             |                         |                                                                                                                                                                   |
| 1.                                   | Interviewer/facilitator | Which author/s conducted the interview or focus group?<br>Yasuki Fujinuma conducted the focus group interview. Masayasu Seki and Tatsuhiro joki assisted. Page 7. |
|                                      |                         | Masayasu Seki, MD, PhD<br>Yasuki Fujinuma, MD<br>Masato Matsushima, MD, PhD, MPH<br>Tatsuhiro Joki, MD, PhD<br>Hideo Okonogi, MD, PhD<br>Yasuhiko Miura, MD, PhD  |
| 2.                                   | Credentials             | What were the researchers' credentials? <i>E.g., PhD, MD</i><br>Jun Hiramoto, MD, PhD<br>Iwao Ohno, MD, PhD. Page 1.                                              |

| No                             | Item                                     | Guide questions/description                                 |                                                                                                                                                    |
|--------------------------------|------------------------------------------|-------------------------------------------------------------|----------------------------------------------------------------------------------------------------------------------------------------------------|
| 3.                             | Occupation                               | What was their occupation at the time of the study?         | All researchers were primary care physician. Page 1.                                                                                               |
| 4.                             | Gender                                   | Was the researcher male or female?                          | All researchers were male. Page 1.                                                                                                                 |
| 5.                             | Experience and training                  | What experience or training did the researcher have?        | We conducted this research using the same analysis as for a previous study. Page 4.                                                                |
| Relationship with participants |                                          |                                                             |                                                                                                                                                    |
| 6.                             | Relationship established                 | Was a relationship established prior to study commencement? | Participants were interviewed after taking the Family Medicine Brush-up Program for two years. Interviewers facilitated the program. Page 4, 5, 6. |
| 7.                             | Participant knowledge of the interviewer | What did the participants know about the researcher? e.g.,  | The participants received an explanation of the taped focus group interview process and gave their consent to participate. Page 5, 6, 7.           |

| No                            | Item                                  | Guide questions/description                                                                                                                          |                                                                                                                                                                                                                                                                                          |
|-------------------------------|---------------------------------------|------------------------------------------------------------------------------------------------------------------------------------------------------|------------------------------------------------------------------------------------------------------------------------------------------------------------------------------------------------------------------------------------------------------------------------------------------|
|                               |                                       | <i>personal goals, reasons for doing the research</i>                                                                                                |                                                                                                                                                                                                                                                                                          |
| 8.                            | Interviewer characteristics           | What characteristics were reported about the interviewer/facilitator?<br><i>e.g., Bias, assumptions, reasons and interests in the research topic</i> | The main interviewer (Yasuki Fujinuma) was practicing primary care and was engaged in research and education activities in family medicine. Page 7.                                                                                                                                      |
| <b>Domain 2: study design</b> |                                       |                                                                                                                                                      |                                                                                                                                                                                                                                                                                          |
|                               |                                       |                                                                                                                                                      | Theoretical framework                                                                                                                                                                                                                                                                    |
| 9.                            | Methodological orientation and theory | What methodological orientation was stated to underpin the study? <i>e.g., grounded theory, discourse analysis, ethnography,</i>                     | We analyzed the interview records with the Steps for Coding and Theorization (SCAT) method, which is a grounded theory-based thematic analysis approach. This method is suitable for the analysis of relatively small samples. The SCAT method improves reflexivity by looking back each |

| No                    | Item               | Guide questions/description                                                                |                                                                                                                        |
|-----------------------|--------------------|--------------------------------------------------------------------------------------------|------------------------------------------------------------------------------------------------------------------------|
|                       |                    | <i>phenomenology, content analysis</i>                                                     | steps, and can be expected to improve the possibility of falsifiability by clarifying the analysis process. Page 7, 8. |
| Participant selection |                    |                                                                                            |                                                                                                                        |
| 10.                   | Sampling           | How were participants selected? <i>e.g., purposive, convenience, consecutive, snowball</i> | Participants were all those who had completed the two-year program. Page 5, 6.                                         |
| 11.                   | Method of approach | How were participants approached? <i>e.g., face-to-face, telephone, mail, email</i>        | Face-to-face. Page 6, 7.                                                                                               |
| 12.                   | Sample size        | How many participants were in the study?                                                   | 8 participants. Page 5, 6.                                                                                             |
| 13.                   | Non-participation  | How many people refused to participate or dropped out? Reasons?                            | None. Page 5, 6.                                                                                                       |

| No              | Item                         | Guide questions/description                                                               |                                                                                                                                                                                                                 |
|-----------------|------------------------------|-------------------------------------------------------------------------------------------|-----------------------------------------------------------------------------------------------------------------------------------------------------------------------------------------------------------------|
| Setting         |                              |                                                                                           |                                                                                                                                                                                                                 |
| 14.             | Setting of data collection   | Where was the data collected?<br><i>e.g., home, clinic, workplace</i>                     | The participants were interviewed in a quiet room undisturbed by daily activities. Page 7.                                                                                                                      |
| 15.             | Presence of non-participants | Was anyone else present besides the participants and researchers?                         | No. Page 6, 7.                                                                                                                                                                                                  |
| 16.             | Description of sample        | What are the important characteristics of the sample? <i>e.g., demographic data, date</i> | Eight participants completed the Family Medicine Brush-up Program targeting physicians who had not undertaken specialist training in family medicine and had qualified at least 10 years previously. Page 5, 6. |
| Data collection |                              |                                                                                           |                                                                                                                                                                                                                 |
| 17.             | Interview guide              | Were questions, prompts, guides provided by the authors? Was it pilot tested?             | The interview was conducted using the guiding questions and was not pilot tested. Page 6, 7.                                                                                                                    |

| No  | Item                   | Guide questions/description                                              |                                                                                         |
|-----|------------------------|--------------------------------------------------------------------------|-----------------------------------------------------------------------------------------|
| 18. | Repeat interviews      | Were repeat interviews carried out? If yes, how many?                    | A single focus group interview was conducted. Page 5, 6.                                |
| 19. | Audio/visual recording | Did the research use audio or visual recording to collect the data?      | The interview was audio-recorded using a digital recorder. Page 5, 6.                   |
| 20. | Field notes            | Were field notes made during and/or after the interview or focus group?  | Yes. Page 6, 7.                                                                         |
| 21. | Duration               | What was the duration of the interviews or focus group?                  | 72 minutes. Page 7.                                                                     |
| 22. | Data saturation        | Was data saturation discussed?                                           | Saturation was defined as the point with no new comments from the participants. Page 7. |
| 23. | Transcripts returned   | Were transcripts returned to participants for comment and/or correction? | No. Page 7.                                                                             |

| No                                     | Item                           | Guide questions/description                                 |                                               |
|----------------------------------------|--------------------------------|-------------------------------------------------------------|-----------------------------------------------|
| <b>Domain 3: analysis and findings</b> |                                |                                                             |                                               |
| Data analysis                          |                                |                                                             |                                               |
| 24.                                    | Number of data coders          | How many data coders coded the data?                        | Two. Page 7.                                  |
| 25.                                    | Description of the coding tree | Did authors provide a description of the coding tree?       | Yes (see results). Page 7, 8.                 |
| 26.                                    | Derivation of themes           | Were themes identified in advance or derived from the data? | Themes were derived from the data. Page 7, 8. |
| 27.                                    | Software                       | What software, if applicable, was used to manage the data?  | Not applicable. Page 7.                       |
| 28.                                    | Participant checking           | Did participants provide feedback on the findings?          | No. Page 7.                                   |

| No        | Item                         | Guide questions/description                                                                                                              |                                                          |
|-----------|------------------------------|------------------------------------------------------------------------------------------------------------------------------------------|----------------------------------------------------------|
| Reporting |                              |                                                                                                                                          |                                                          |
| 29.       | Quotations presented         | Were participant quotations presented to illustrate the themes/ findings? Was each quotation identified? e.g., <i>participant number</i> | Yes, quotations are presented and identified. Page 8, 9. |
| 30.       | Data and findings consistent | Was there consistency between the data presented and the findings?                                                                       | Yes. Page 8, 9, 10, 11.                                  |
| 31.       | Clarity of major themes      | Were major themes clearly presented in the findings?                                                                                     | Yes. Page 8, 9.                                          |
| 32.       | Clarity of minor themes      | Is there a description of diverse cases or discussion of minor themes?                                                                   | Yes. Page 8, 9, 10, 11.                                  |
